# Supplementary material
Source: publisher figshare collection journal article supplement (https://acs.figshare.com/ndownloader/files/6406500)
Supplement: Supplementary file 1 [file 6406500]

# Supporting Information

## $\text{Yb}^{3+}/\text{Ho}^{3+}$ Co-Doped Apatite Upconversion Nanoparticles to Distinguish Implanted Material from Bone Tissue

*Xiyu Li and Haifeng Chen\**

Department of Biomedical Engineering, College of Engineering, Peking University,  
Beijing, 100871, China

\*Haifeng Chen. E-mail: [haifeng.chen@pku.edu.cn](mailto:haifeng.chen@pku.edu.cn)

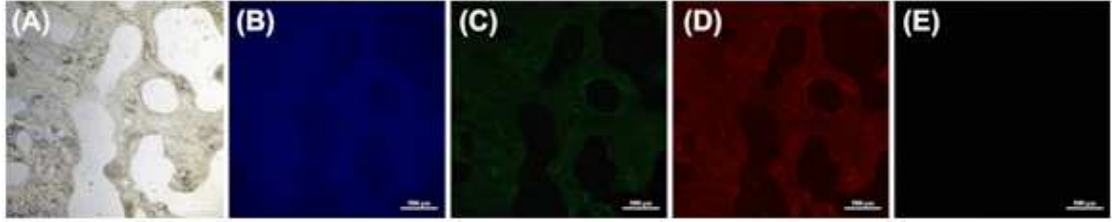

**Figure S1.** Light microscopy image (A) of natural bone tissue without staining, and corresponding fluorescent images under excitation by UV (B), blue (C), green (D), and 980 nm near-infrared (E) light, scale bar = 500  $\mu\text{m}$ .

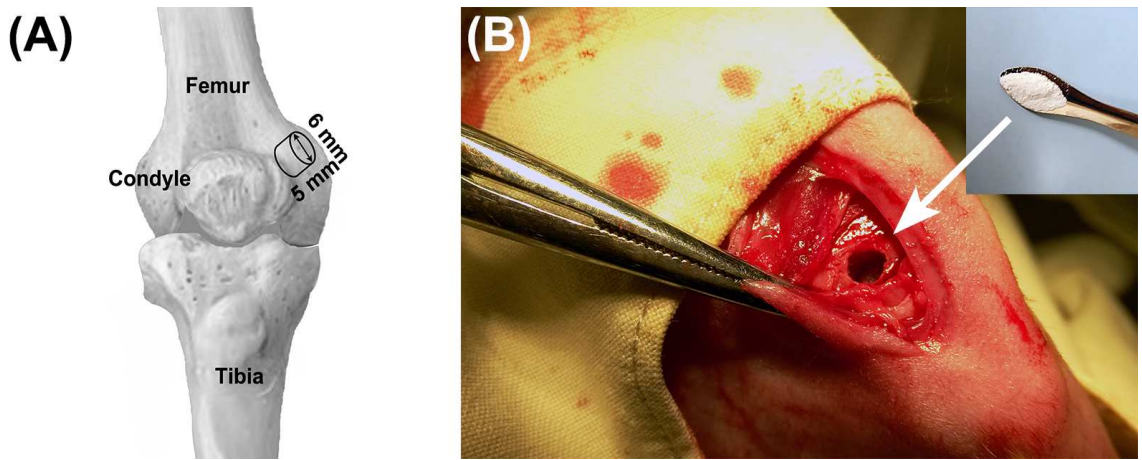

**Figure S2.** The cylindrical bone defect (diameter 6 mm, depth 5 mm) on the left distal femoral condyle (A), and the FA:Yb<sup>3+</sup>/Ho<sup>3+</sup> particles implanted into the defect (0.2 g in each defect) (B).
